# Supplementary material
Source: MDPI journal article supplement (https://www.mdpi.com/2673-8112/2/5/51)
Supplement: s1 [file s1]

## Supplementary Materials

### *Matlab code for Reading COVID-19 data from the “Our World Data” Web site*

Table S1. MATLAB code for reading data.

---

```
function downloadfile()
import java.io.FileOutputStream;
import java.io.IOException;
import java.net.URL;
import java.nio.channels.Channels;
import java.nio.channels.ReadableByteChannel;
import java.text.DateFormat;
import java.text.ParseException;
import java.text.SimpleDateFormat;
import java.util.Calendar;
import java.util.Date;
combo = "COVID-19A"; userDate = '06-08-2021';
formatter = java.text.SimpleDateFormat('dd-MM-yyyy');
cal = java.util.Calendar.getInstance();
df = java.text.SimpleDateFormat('dd-MM-yyyy');
date1 = formatter.parse(userDate);
    cal.setTime(date1); cal.add(Calendar.DATE, -1);
    date2 = cal.getTime();
endDate = df.format(date2);
disp(endDate)
cal.setTime(date1); cal.add(Calendar.DATE, - 270); date3 = cal.getTime();
startDate = df.format(date3); disp(startDate);
url1 = 'https://data.world/covid-19-data-resource-hub/covid-19-case-
counts/workspace/file?filename=COVID-19+Cases.csv';
v =intmax('int64'); %realmax('double'); %java.lang.Long.MAX_VALUE;
fileName = "\ \"+combo+".csv";
url_login = "https://data.world/login"
[stat,h] = web(url_login) %Enter username and password in the popup
setCurrentLocation(h, url1)
url2= 'https://query.data.world/s/mudfcqv7ke5xrp6cp4j234j6xjbknb';
    website = URL(url2);
    rbc = Channels.newChannel(website.openStream());
    fos = FileOutputStream(fileName);
    fos.getChannel().transferFrom(rbc, 0, v);
    fos.close();
```

---
